# Supplementary material for: Shoreline and land use–land cover changes along the 2004-tsunami-affected South Andaman coast: understanding changing hazard susceptibility
Source: Copernicus journal article supplement (doi:10.5194/nhess-24-3013-2024), 2024-09-10
Supplement: Supplementary file 1 [file nhess-24-3013-2024-supplement.pdf]

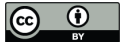

*Supplement of*

## **Shoreline and land use–land cover changes along the 2004-tsunami-affected South Andaman coast: understanding changing hazard susceptibility**

**Vikas Ghadamode et al.**

*Correspondence to:* Anand K. Pandey ([akpandey@ngri.res.in](mailto:akpandey@ngri.res.in))

The copyright of individual parts of the supplement might differ from the article licence.

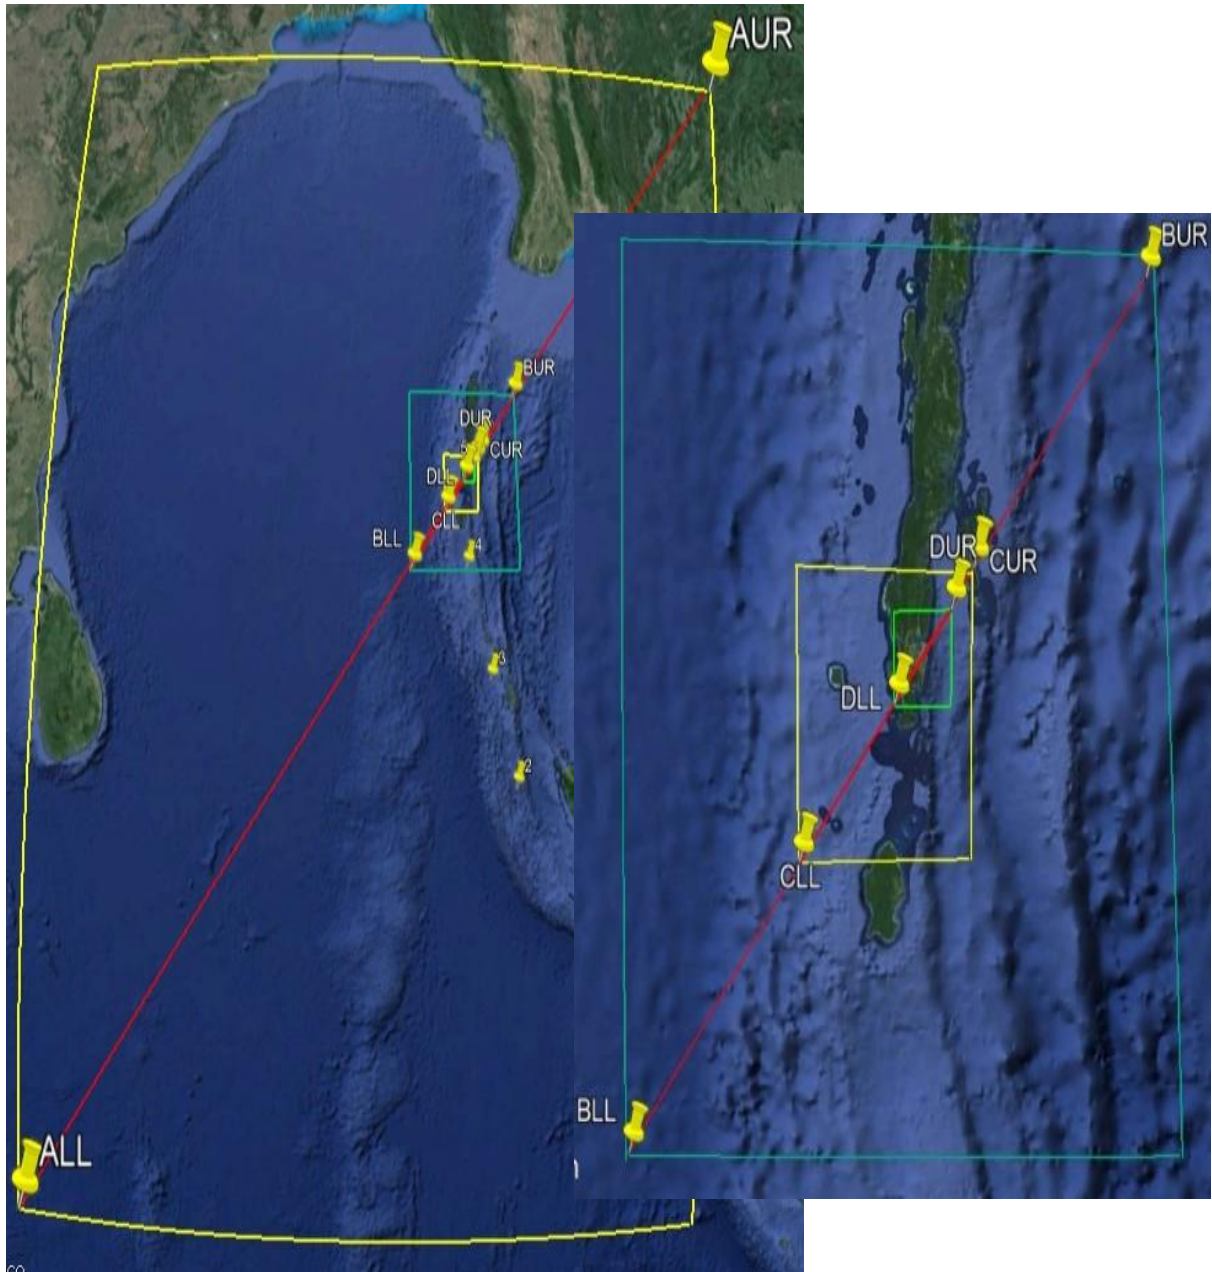

Figure S1: A-D grids used for the TUNAMI-N2 modeling in the present study (Source: Background images are from © Google Earth)

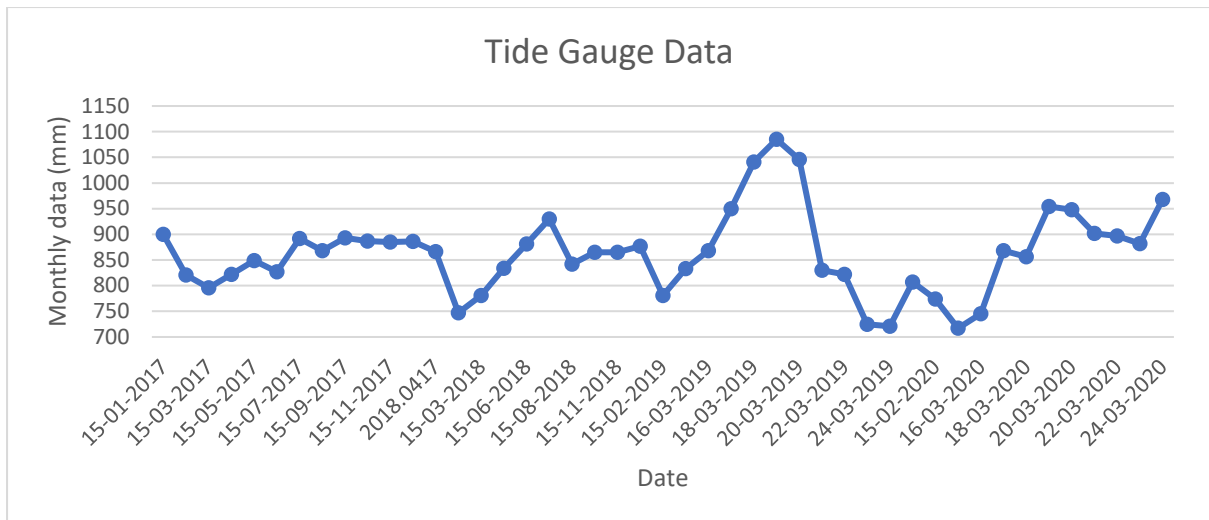

Figure S2: Monthly mean sea level data showing tide excursion (Tide Gauge data)

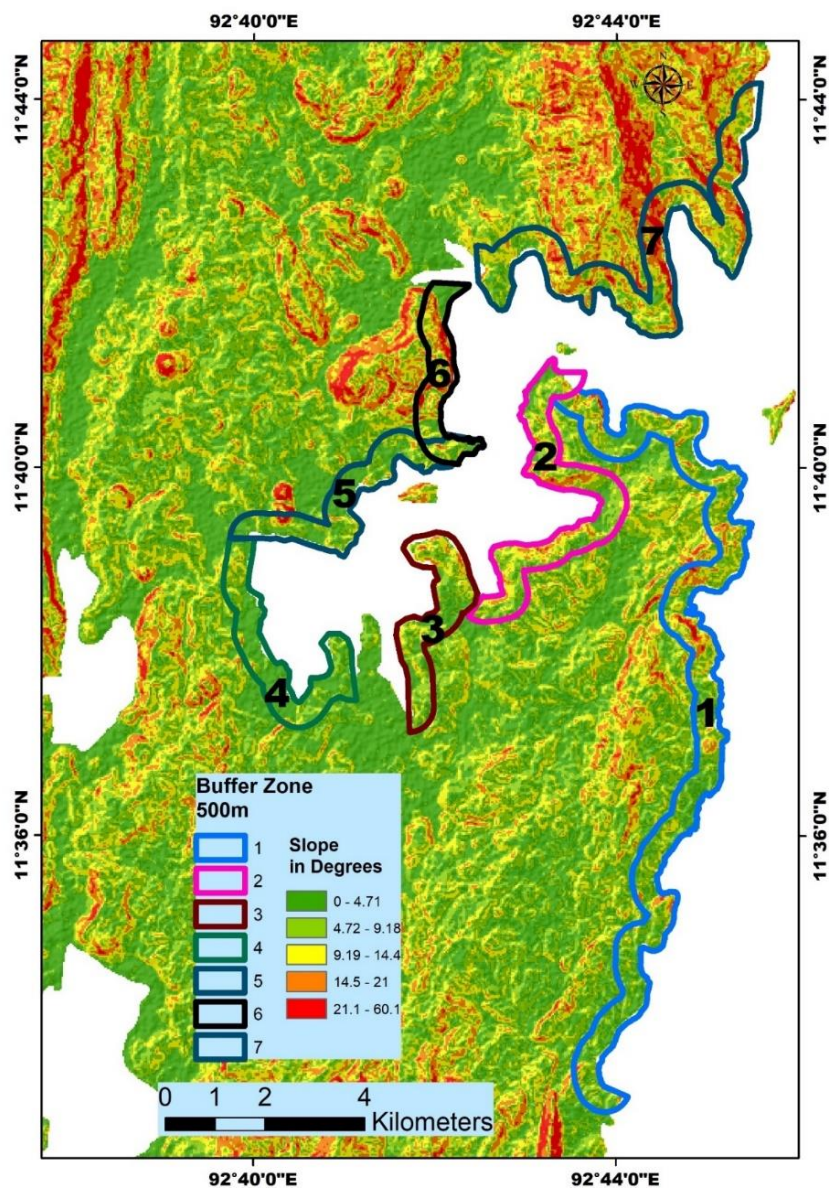

Figure S3: Slope Map showing 500m buffer marked along the shoreline

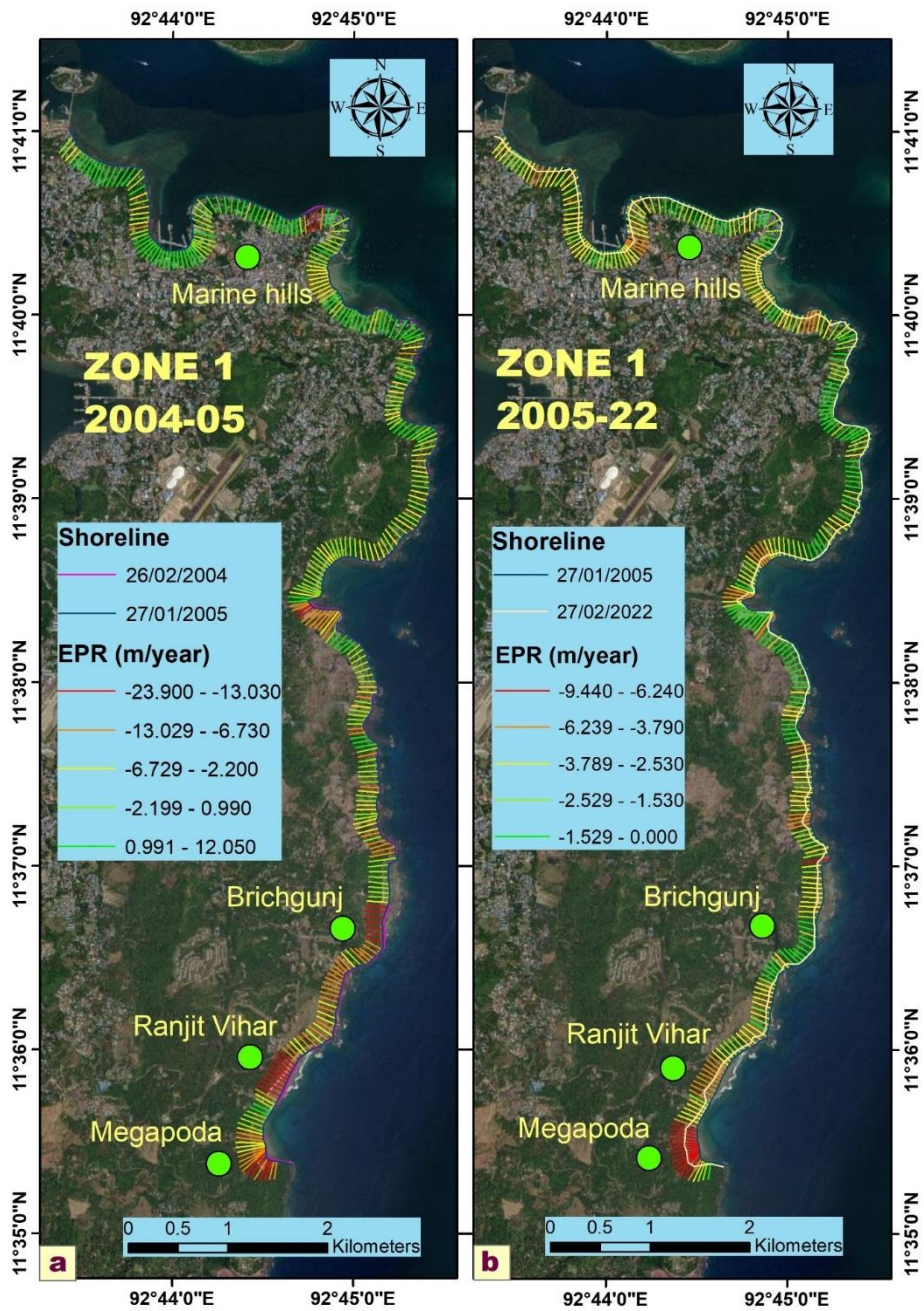

Figure S4: Analysis of the Erosion and Accretion rate in Zone 1 of the South Andaman shoreline between (a) 2004 to 2005 and (b) 2005-2022 using EPR methods (Source: Background images are from © Google Earth)

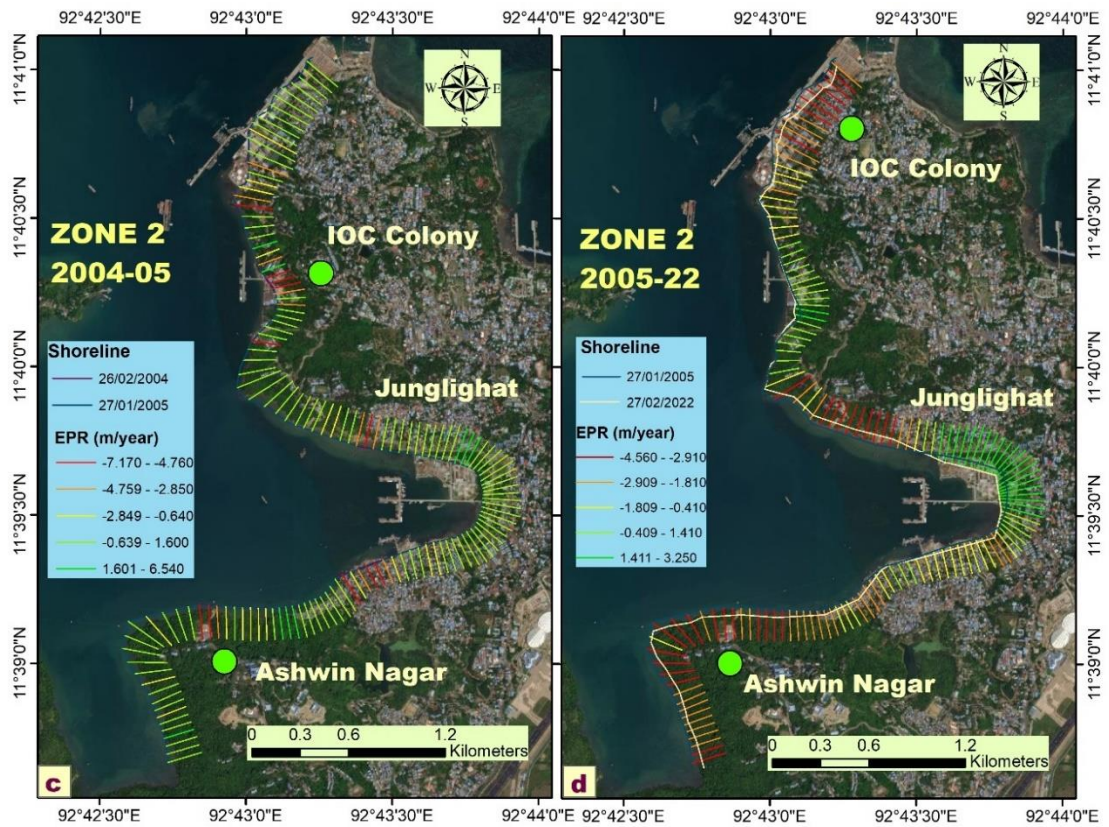

Figure S5: Erosion and Accretion rate occurred between (c) 2004-2005 and (d) 2005-2022 in Zone 2 of the South Andaman shoreline using EPR methods (Source: Background images are from © Google Earth).

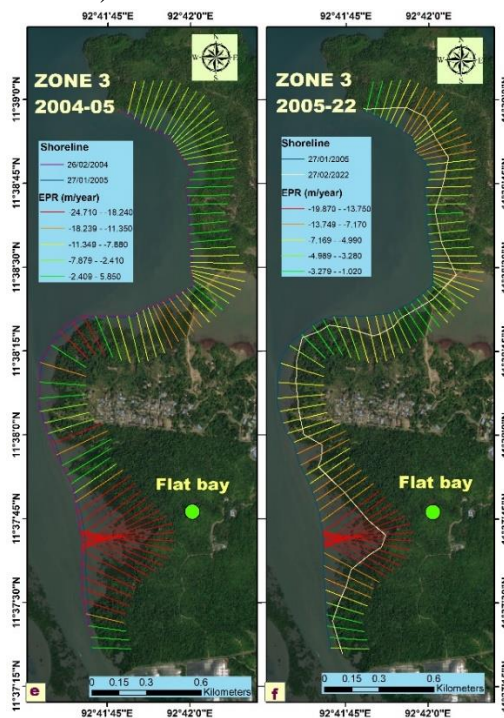

Figure S6: Erosion and Accretion rate occurred between (e) 2004-2005 and (f) 2005-2022 in Zone 3 of the South Andaman shoreline using EPR methods (Source: Background images are from © Google Earth).

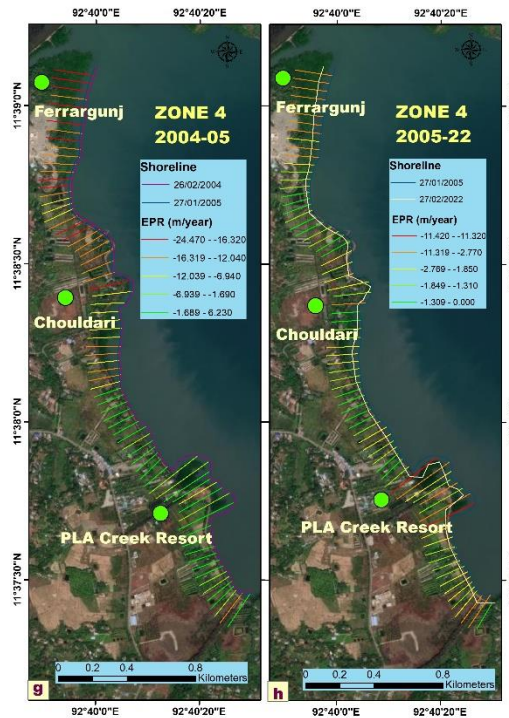

Figure S7: Erosion and Accretion rate occurred between (g) 2004-2005 and (h) 2005-2022 in Zone 4 of the South Andaman shoreline using EPR methods (Source: Background images are from © Google Earth)

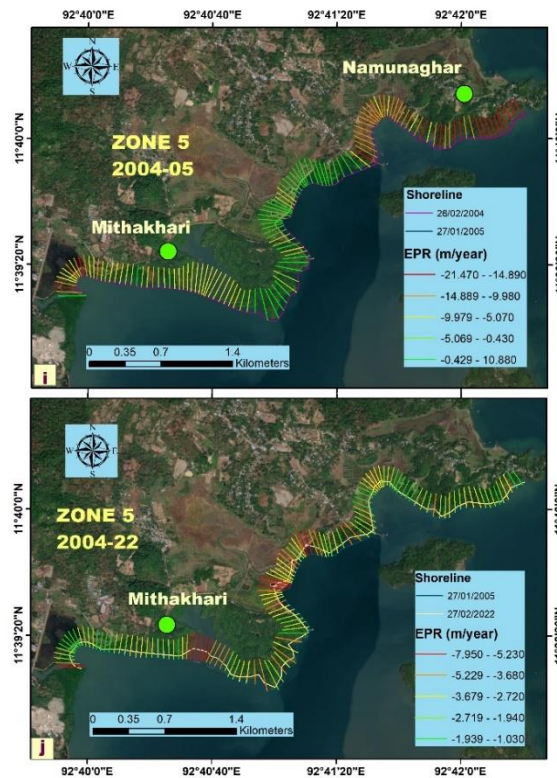

Figure S8: Erosion and Accretion rate occurred between (i) 2004-2005 and (j) 2005-2022 in Zone 5 of the South Andaman shoreline using EPR methods (Source: Background images are from © Google Earth)

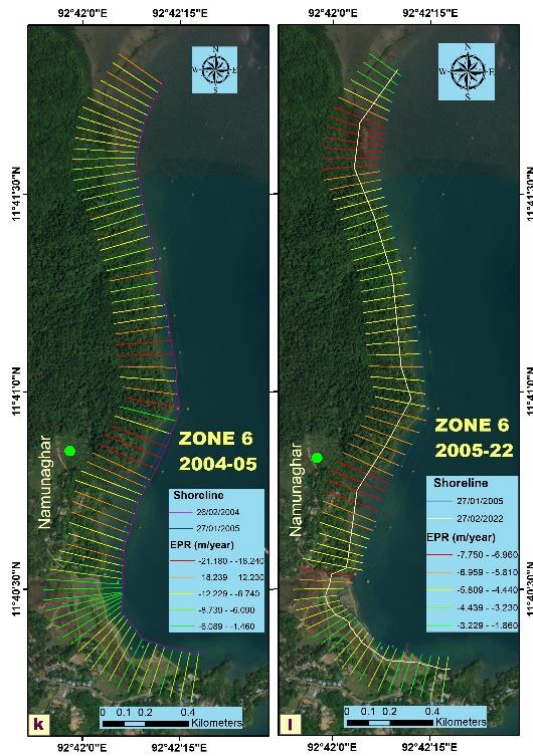

Figure S9: Erosion and Accretion rate occurred between (k) 2004-2005 and (l) 2005-2022 in Zone 6 of the South Andaman shoreline using EPR methods (Source: Background images are from © Google Earth)

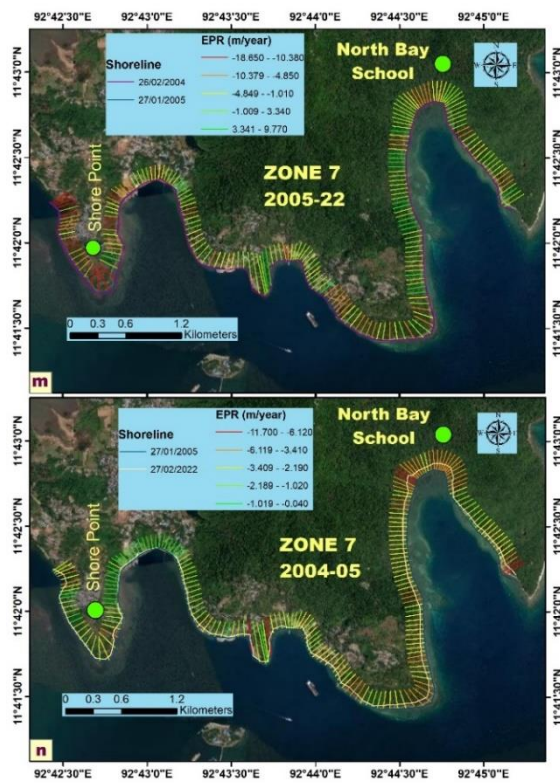

Figure S10: Erosion and Accretion rate occurred between (m) 2004-2005 and (n) 2005-2022 in Zone 7 of the South Andaman shoreline using EPR methods (Source: Background images are from © Google Earth)

Table S1: Uncertainty Calculation used in the DSAS tool

|                                         |         |         |         |         |           |           |
|-----------------------------------------|---------|---------|---------|---------|-----------|-----------|
| Positional Error (m)                    | 2003    | 2004    | 2017    | 2018    | 2019      | 2020      |
| Seasonal Error (Es))                    | 5       | 5       | 5       | 5       | 5         | 5         |
| Tidal fluctuation (Etd)                 | 1.17    | 0.38    | 0.86    | 1.1     | 0.84      | 0.85      |
| Shoreline proxy offset (Eo)             | NA      | NA      | NA      | NA      | NA        | NA        |
| Measurement errors (m)                  | 0       | 0       | 0       | 0       | 0         | 0         |
| Georeferencing/Rectification error (Er) | 0       | 0       | 0       | 0       | 0         | 0         |
| Digitizing Error (Ed)                   | 20      | 20      | 15      | 20      | 20        | 19        |
| Toposheet survey offset (Et)            | NA      | NA      | NA      | NA      | NA        | NA        |
| Pixel Error (Ep)                        | 0       | 0       | 0       | 0       | 0         | 0         |
| Total Shoreline position error (Esp) m  | 26.17   | 25.38   | 20.86   | 26.10   | 25.84     | 24.85     |
|                                         |         |         |         |         |           |           |
| Year                                    | 2003-04 | 2004-05 | 2017-18 | 2018-19 | 2019-2020 | 2020-2021 |
| Uncertainty                             | 7.18    | 5.04    | 6.85    | 7.21    | 7.12      | 4.98      |

Table S2: Mean Slope of Area

| Zone | AREA (Sq. Km) | MIN (Degrees) | MAX (Degrees) | RANGE (Degrees) | MEAN (Degrees) | STD (Degrees) |
|------|---------------|---------------|---------------|-----------------|----------------|---------------|
| 1    | 9.77          | 0             | 36.98         | 36.98           | 7.22           | 4.69          |
| 2    | 4.07          | 0             | 24.96         | 24.96           | 8.18           | 4.66          |
| 3    | 2.44          | 0             | 23.50         | 23.50           | 6.60           | 3.95          |
| 4    | 2.83          | 0             | 20.72         | 20.72           | 4.13           | 3.32          |
| 5    | 2.87          | 0             | 33.82         | 33.82           | 5.56           | 4.52          |
| 6    | 1.61          | 0             | 33.75         | 33.41           | 11.4           | 6.90          |
| 7    | 6.12          | 0             | 37.81         | 37.81           | 12.3           | 5.99          |

Table S3 Accuracy Assessment of LULC Classification

| LULC Classes     | 2004    |        | 2005    |        | 2022    |        |
|------------------|---------|--------|---------|--------|---------|--------|
|                  | PA (%)  | UA (%) | PA (%)  | UA (%) | PA (%)  | UA (%) |
| Built-Up         | 88.88   | 80     | 72.72   | 80     | 88.88   | 80     |
| Forest           | 93.3    | 94.35  | 92.68   | 94.21  | 92.43   | 91.82  |
| Inundation       | 100     | 90     | 88.88   | 80     | 90.90   | 100    |
| Cropland         | 61.90   | 72.22  | 73.33   | 78.57  | 73.33   | 61     |
| Water Bodies     | 100     | 80     | 100     | 70     | 90.90   | 100    |
| Overall accuracy | 90.11 % |        | 89.69 % |        | 90.30 % |        |
| Kappa Statistics | 0.78    |        | 0.76    |        | 0.79    |        |

PA: Producer's Accuracy, UA: User's Accuracy
